# Supplementary material for: Preoperative Systemic Inflammation Score Predicts the Prognosis of Patients with Upper Tract Urothelial Carcinoma Undergoing Radical Nephroureterectomy
Source: MDPI journal article supplement (doi:10.3390/jcm13030791), 2024-01-30
Supplement: s1 [file s1]

**Supplementary Table S2.** Univariate and multivariate analysis of SIS on survival outcomes in high-grade UTUC subgroup.

| Variables       | Overall survival   |         |                     |         | Cancer-Specific Survival |         |                             |         | Progression-free survival |         |                    |         |
|-----------------|--------------------|---------|---------------------|---------|--------------------------|---------|-----------------------------|---------|---------------------------|---------|--------------------|---------|
|                 | Univariable        |         | Multivariable       |         | Univariable              |         | Multivariable               |         | Univariable               |         | Multivariable      |         |
|                 | HR (95%CI)         | P value | HR (95%CI)          | P value | HR (95%CI)               | P value | HR (95%CI)                  | P value | HR (95%CI)                | P value | HR (95%CI)         | P value |
| Age             | 1.00 (0.98, 1.03)  | 0.7820  |                     |         | 1.00 (0.97, 1.02)        | 0.6895  |                             |         | 0.99 (0.97, 1.01)         | 0.2948  |                    |         |
| Body mass index | 1.03 (0.96, 1.12)  | 0.3829  |                     |         | 1.06 (0.98, 1.15)        | 0.1575  |                             |         | 1.02 (0.95, 1.09)         | 0.6186  |                    |         |
| Gender          |                    |         |                     |         |                          |         |                             |         |                           |         |                    |         |
| Female          | Reference          |         |                     |         | Reference                |         |                             |         | Reference                 |         |                    |         |
| Male            | 0.91 (0.56, 1.48)  | 0.7101  |                     |         | 1.07 (0.65, 1.77)        | 0.7880  |                             |         | 0.70 (0.43, 1.13)         | 0.1425  |                    |         |
| Smoking         |                    |         |                     |         |                          |         |                             |         |                           |         |                    |         |
| None/Former     | Reference          |         |                     |         | Reference                |         |                             |         | Reference                 |         |                    |         |
| Current         | 0.97 (0.56, 1.66)  | 0.9018  |                     |         | 0.94 (0.53, 1.67)        | 0.8381  |                             |         | 0.85 (0.49, 1.46)         | 0.5470  |                    |         |
| Tumor stage     |                    |         |                     |         |                          |         |                             |         |                           |         |                    |         |
| <T3             | Reference          |         | Reference           |         | Reference                |         |                             |         | Reference                 |         | Reference          |         |
| ≥T3             | 3.33 (1.89, 5.86)  | <0.0001 | 2.39 (1.21, 4.72)   | 0.0122  | 3.94 (2.12, 7.32)        | <0.0001 | 3.68 (1.65, 8.19)           | 0.0014  | 2.62 (1.56, 4.42)         | 0.0003  | 2.45 (1.24, 4.83)  | 0.0100  |
| LNM             |                    |         |                     |         |                          |         |                             |         |                           |         |                    |         |
| pN0             | Reference          |         | Reference           |         | Reference                |         |                             |         | Reference                 |         | Reference          |         |
| pN+             | 2.84 (1.05, 7.69)  | 0.0406  | 2.83 (0.88, 9.12)   | 0.0816  | 7.22 (1.58, 33.00)       | 0.0108  | 8.09 (1.34, 48.84)          | 0.0227  | 10.60 (2.34, 48.00)       | 0.0022  | 4.37 (0.93, 20.57) | 0.0620  |
| pNx             | 1.07 (0.46, 2.50)  | 0.8759  | 1.51 (0.53, 4.32)   | 0.4380  | 3.17 (0.77, 13.02)       | 0.1103  | 6.30 (1.19, 33.36)          | 0.0303  | 3.92 (0.96, 16.08)        | 0.0575  | 2.73 (0.65, 11.58) | 0.1719  |
| LVI             |                    |         |                     |         |                          |         |                             |         |                           |         |                    |         |
| No              | Reference          |         |                     |         | Reference                |         |                             |         | Reference                 |         |                    |         |
| Yes             | 1.68 (0.92, 3.09)  | 0.0928  | 1.34 (0.68, 2.62)   | 0.3939  | 1.91 (1.03, 3.54)        | 0.0394  | 1.44 (0.72, 2.86)           | 0.3023  | 1.21 (0.64, 2.31)         | 0.5608  |                    |         |
| Tumor site      |                    |         |                     |         |                          |         |                             |         |                           |         |                    |         |
| Renal pelvis    | Reference          |         |                     |         | Reference                |         |                             |         | Reference                 |         |                    |         |
| Ureter          | 1.22 (0.74, 2.03)  | 0.4332  | 0.92 (0.53, 1.61)   | 0.7825  | 1.22 (0.71, 2.07)        | 0.4718  | 0.83 (0.44, 1.56)<br>0.5612 |         | 1.14 (0.71, 1.83)         | 0.6009  |                    |         |
| Both            | 6.03 (2.06, 17.66) | 0.0010  | 13.67 (4.09, 45.71) | <0.0001 | 6.81 (2.31, 20.13)       | 0.0005  | 33.99 (8.72, 132.51)        | <0.0001 | 5.13 (0.68, 38.40)        | 0.1116  |                    |         |
| Tumor size      |                    |         |                     |         |                          |         |                             |         |                           |         |                    |         |
| <3              | Reference          |         |                     |         | Reference                |         |                             |         | Reference                 |         | Reference          |         |
| ≥3              | 1.60 (0.91, 2.81)  | 0.1008  |                     |         | 1.67 (0.92, 3.04)        | 0.0914  | 1.00 (0.47, 2.14)           | 0.9971  | 1.71 (0.97, 3.04)         | 0.0652  | 1.65 (0.72, 3.80)  | 0.2356  |
| Multifocal      |                    |         |                     |         |                          |         |                             |         |                           |         |                    |         |
| No              | Reference          |         |                     |         | Reference                |         |                             |         | Reference                 |         |                    |         |
| Yes             | 0.80 (0.44, 1.47)  | 0.4762  |                     |         | 0.90 (0.49, 1.67)        | 0.7420  |                             |         | 1.04 (0.60, 1.80)         | 0.8862  |                    |         |
| Tumor necrosis  |                    |         |                     |         |                          |         |                             |         |                           |         |                    |         |
| No              | Reference          |         |                     |         | Reference                |         |                             |         | Reference                 |         |                    |         |
| Yes             | 0.74 (0.18, 3.02)  | 0.6695  |                     |         | 0.84 (0.20, 3.45)        | 0.8075  |                             |         | 2.01 (0.73, 5.53)         | 0.1746  |                    |         |
| Blood type      |                    |         |                     |         |                          |         |                             |         |                           |         |                    |         |
| A               | Reference          |         |                     |         | Reference                |         |                             |         | Reference                 |         |                    |         |
| B               | 0.54 (0.27, 1.09)  | 0.0864  |                     |         | 0.50 (0.23, 1.06)        | 0.0717  | 0.62 (0.26, 1.48)           | 0.2827  | 0.85 (0.45, 1.64)         | 0.6360  |                    |         |
| AB              | 1.75 (0.82, 3.71)  | 0.1461  |                     |         | 1.48 (0.64, 3.42)        | 0.3622  | 1.81 (0.74, 4.46)           | 0.1949  | 1.17 (0.50, 2.74)         | 0.7106  |                    |         |
| O               | 0.74 (0.42, 1.33)  | 0.3212  |                     |         | 0.86 (0.48, 1.55)        | 0.6163  | 0.69 (0.36, 1.35)           | 0.2783  | 1.02 (0.58, 1.80)         | 0.9449  |                    |         |

|                    |                   |        |                   |        |                   |        |                   |        |                   |        |                   |        |
|--------------------|-------------------|--------|-------------------|--------|-------------------|--------|-------------------|--------|-------------------|--------|-------------------|--------|
| Hematuria          |                   |        |                   |        |                   |        |                   |        |                   |        |                   |        |
| No                 | Reference         |        | Reference         |        | Reference         |        |                   |        | Reference         |        | Reference         |        |
| Yes                | 0.42 (0.25, 0.70) | 0.0009 | 0.47 (0.27, 0.84) | 0.0113 | 0.41 (0.24, 0.70) | 0.0010 | 0.38 (0.20, 0.69) | 0.0016 | 0.57 (0.34, 0.96) | 0.0335 | 0.64 (0.37, 1.12) | 0.1157 |
| Surgery margin     |                   |        |                   |        |                   |        |                   |        |                   |        |                   |        |
| Negative           | Reference         |        | Reference         |        | Reference         |        |                   |        | Reference         |        | Reference         |        |
| Positive           | 2.06 (1.02, 4.18) | 0.0450 | 2.09 (0.97, 4.50) | 0.0601 | 2.28 (1.12, 4.65) | 0.0234 | 1.92 (0.87, 4.24) | 0.1086 | 1.81 (0.90, 3.64) | 0.0985 | 2.14 (0.98, 4.70) | 0.0578 |
| Bladder irrigation |                   |        |                   |        |                   |        |                   |        |                   |        |                   |        |
| No                 | Reference         |        |                   |        | Reference         |        |                   |        | Reference         |        |                   |        |
| Unilateral         | 1.29 (0.42, 4.01) | 0.6551 |                   |        | 1.37 (0.44, 4.30) | 0.5895 |                   |        | 0.86 (0.19, 3.86) | 0.8479 |                   |        |
| Bilateral          | 0.57 (0.23, 1.44) | 0.2377 |                   |        | 0.43 (0.15, 1.24) | 0.1194 |                   |        | 0.60 (0.24, 1.53) | 0.2873 |                   |        |
| Tumor architecture |                   |        |                   |        |                   |        |                   |        |                   |        |                   |        |
| Sessile            | Reference         |        |                   |        | Reference         |        |                   |        | Reference         |        | Reference         |        |
| Papillary          | 0.25 (0.10, 0.63) | 0.0033 | 0.42 (0.16, 1.13) | 0.0870 | 0.22 (0.08, 0.60) | 0.0032 | 0.50 (0.15, 1.65) | 0.2554 | 0.51 (0.26, 1.00) | 0.0505 | 0.99 (0.38, 2.56) | 0.9839 |
| BCM                |                   |        |                   |        |                   |        |                   |        |                   |        |                   |        |
| No                 | Reference         |        |                   |        | Reference         |        |                   |        | Reference         |        | Reference         |        |
| Yes                | 0.79(0.29, 2.17)  | 0.6430 |                   |        | 0.89 (0.32, 2.46) | 0.8230 |                   |        | 1.66 (0.76, 3.64) | 0.2048 |                   |        |
| Co-bladder cancer  |                   |        |                   |        |                   |        |                   |        |                   |        |                   |        |
| No                 | Reference         |        |                   |        | Reference         |        |                   |        | Reference         |        | Reference         |        |
| Yes                | 0.67(0.40, 1.12)  | 0.1262 |                   |        | 0.78 (0.45, 1.33) | 0.3522 |                   |        | 0.40 (0.24, 0.68) | 0.0007 | 0.44 (0.25, 0.78) | 0.0046 |
| SIS(0 vs. 1)       |                   |        |                   |        |                   |        |                   |        |                   |        |                   |        |
| low                | Reference         |        | Reference         |        | Reference         |        |                   |        | Reference         |        | Reference         |        |
| high               | 1.92 (1.18, 3.11) | 0.0085 | 1.89 (1.11, 3.21) | 0.0183 | 1.90 (1.14, 3.15) | 0.0136 | 1.89 (1.07, 3.33) | 0.0285 | 1.90 (1.19, 3.05) | 0.0075 | 1.48 (0.88, 2.51) | 0.1415 |

<sup>a</sup>**Abbreviations:** UTUC = upper tract urothelial carcinoma, HR = hazard ratio, CI = confidence interval, SIS = systemic inflammation score, LNM = lymph node metastasis, LVI = lymphovascular invasion, BCM = bladder cuff management.
