# Supplementary material for: Preoperative Systemic Inflammation Score Predicts the Prognosis of Patients with Upper Tract Urothelial Carcinoma Undergoing Radical Nephroureterectomy
Source: MDPI journal article supplement (doi:10.3390/jcm13030791), 2024-01-30
Supplement: s1 [file s1]

**Supplementary Table S1.** Univariate and multivariate analysis of SIS on survival outcomes in UTUC patients.

| Variables       | Overall survival |         |                     |         | Cancer-Specific Survival |         |                     |         | Progression-free survival |         |                             |         |
|-----------------|------------------|---------|---------------------|---------|--------------------------|---------|---------------------|---------|---------------------------|---------|-----------------------------|---------|
|                 | Univariable      |         | Multivariable       |         | Univariable              |         | Multivariable       |         | Univariable               |         | Multivariable               |         |
|                 | HR (95%CI)       | P value | HR (95%CI)          | P value | HR (95%CI)               | P value | HR (95%CI)          | P value | HR (95%CI)                | P value | HR (95%CI)                  | P value |
| Age             | 1.00(0.98, 1.03) | 0.6661  |                     |         | 1.00(0.97, 1.02)         | 0.8583  |                     |         | 1.00 (0.98, 1.02)         | 0.6743  |                             |         |
| Body mass index | 1.04(0.96,1.12)  | 0.3598  |                     |         | 1.05 (0.98, 1.14)        | 0.1838  |                     |         | 1.03 (0.97, 1.10)         | 0.3300  |                             |         |
| Gender          |                  |         |                     |         |                          |         |                     |         |                           |         |                             |         |
| Female          | Reference        |         |                     |         | Reference                |         |                     |         | Reference                 |         |                             |         |
| Male            | 0.72(0.45, 1.13) | 0.1555  |                     |         | 1.31 (0.81, 2.12)        | 0.2650  |                     |         | 0.78 (0.51, 1.18)         | 0.2376  |                             |         |
| Smoking         |                  |         |                     |         |                          |         |                     |         |                           |         |                             |         |
| None/Former     | Reference        |         |                     |         | Reference                |         |                     |         | Reference                 |         |                             |         |
| Current         | 0.86(0.51,1.45)  | 0.5805  |                     |         | 0.86 (0.49, 1.48)        | 0.5801  |                     |         | 0.76 (0.46, 1.24)         | 0.2722  |                             |         |
| Tumor stage     |                  |         |                     |         |                          |         |                     |         |                           |         |                             |         |
| <T3             | Reference        |         | Reference           |         | Reference                |         |                     |         | Reference                 |         | Reference                   |         |
| ≥T3             | 4.22(2.53,7.03)  | <0.0001 | 2.59 (1.34, 5.03)   | 0.0049  | 5.01 (2.87, 8.75)        | <0.0001 | 2.88 (1.49, 5.57)   | 0.0016  | 3.01 (1.95, 4.65)         | <0.0001 | 2.57 (1.45, 4.56)           | 0.0012  |
| Tumor grade     |                  |         |                     |         |                          |         |                     |         |                           |         |                             |         |
| Low             | Reference        |         | Reference           |         | Reference                |         |                     |         | Reference                 |         | Reference                   |         |
| High            | 5.14(2.23,11.86) | 0.0001  | 2.58 (0.86, 7.75)   | 0.0910  | 5.64 (2.26, 14.05)       | 0.0002  | 5.08 (1.65, 15.64)  | 0.0046  | 2.03 (1.20, 3.46)         | 0.0087  | 0.91 (0.46, 1.83)           | 0.8011  |
| LNM             |                  |         |                     |         |                          |         |                     |         |                           |         |                             |         |
| pN0             | Reference        |         | Reference           |         | Reference                |         |                     |         | Reference                 |         | Reference                   |         |
| pN+             | 2.88(1.06,7.82)  | 0.0376  | 2.06 (0.60, 7.09)   | 0.2504  | 7.37(1.61, 33.69)        | 0.0100  | 5.96 (1.18, 30.03)  | 0.0304  | 11.00 (2.43, 49.80)       | 0.0019  | 4.26 (0.91, 19.95)          | 0.0660  |
| pNx             | 0.78(0.33,1.80)  | 0.5571  | 1.08 (0.35, 3.30)   | 0.8986  | 2.26 (0.55, 9.27)        | 0.2575  | 4.33 (0.96, 19.57)  | 0.0572  | 3.25 (0.80, 13.22)        | 0.1005  | 2.68 (0.64, 11.29)          | 0.1796  |
| LVI             |                  |         |                     |         |                          |         |                     |         |                           |         |                             |         |
| No              | Reference        |         | Reference           |         | Reference                |         |                     |         | Reference                 |         | Reference                   |         |
| Yes             | 2.31(1.26,4.21)  | 0.0065  | 1.83 (0.91, 3.70)   | 0.0917  | 2.64 (1.44, 4.86)        | 0.0018  | 1.51 (0.77, 2.98)   | 0.2308  | 1.48 (0.79, 2.78)         | 0.2257  | 1.51 (0.77, 2.98)<br>0.2308 |         |
| Tumor site      |                  |         |                     |         |                          |         |                     |         |                           |         |                             |         |
| Renal pelvis    | Reference        |         | Reference           |         | Reference                |         |                     |         | Reference                 |         |                             |         |
| Ureter          | 1.16(0.71,1.90)  | 0.5424  | 1.21 (0.66, 2.21)   | 0.5411  | 1.13 (0.67, 1.89)        | 0.6450  | 0.90 (0.50, 1.64)   | 0.7414  | 1.06 (0.70, 1.63)         | 0.7726  |                             |         |
| Both            | 4.83(1.98,11.77) | 0.0005  | 13.54 (4.49, 40.86) | <0.0001 | 5.26 (2.15, 12.91)       | 0.0003  | 17.38 (5.89, 51.33) | <0.0001 | 3.03 (0.73, 12.59)        | 0.1273  |                             |         |
| Tumor size      |                  |         |                     |         |                          |         |                     |         |                           |         |                             |         |
| <3              | Reference        |         | Reference           |         | Reference                |         |                     |         | Reference                 |         | Reference                   |         |
| ≥3              | 1.79(1.04,3.08)  | 0.0361  | 1.05 (0.47, 2.36)   | 0.9070  | 1.83 (1.03, 3.25)        | 0.0404  | 0.97 (0.49, 1.91)   | 0.9230  | 1.69 (1.03, 2.77)         | 0.0364  | 1.49 (0.79, 2.82)           | 0.2203  |
| Multifocal      |                  |         |                     |         |                          |         |                     |         |                           |         |                             |         |
| No              | Reference        |         |                     |         | Reference                |         |                     |         | Reference                 |         | Reference                   |         |
| Yes             | 0.67(0.37,1.21)  | 0.1827  |                     |         | 0.75 (0.41, 1.38)        | 0.3631  | 0.42 (0.23, 0.75)   | 0.0035  | 1.01 (0.62, 1.65)         | 0.9746  | 1.10 (0.65, 1.86)           | 0.7275  |
| Tumor necrosis  |                  |         |                     |         |                          |         |                     |         |                           |         |                             |         |
| No              | Reference        |         |                     |         | Reference                |         |                     |         | Reference                 |         |                             |         |
| Yes             | 0.47(0.11,1.91)  | 0.2889  |                     |         | 0.51 (0.13, 2.09)        | 0.3511  |                     |         | 0.85 (0.31, 2.31)         | 0.7473  |                             |         |
| Blood type      |                  |         |                     |         |                          |         |                     |         |                           |         |                             |         |
| A               | Reference        |         |                     |         | Reference                |         |                     |         | Reference                 |         |                             |         |

|                    |                  |         |                   |        |                   |         |                   |        |                   |         |                   |        |
|--------------------|------------------|---------|-------------------|--------|-------------------|---------|-------------------|--------|-------------------|---------|-------------------|--------|
| B                  | 0.67(0.35,1.28)  | 0.2275  |                   |        | 0.63 (0.31, 1.27) | 0.1969  |                   |        | 1.14 (0.63, 2.05) | 0.6653  |                   |        |
| AB                 | 1.57(0.77,3.21)  | 0.2190  |                   |        | 1.38 (0.63, 3.05) | 0.4206  |                   |        | 1.25 (0.59, 2.66) | 0.5587  |                   |        |
| O                  | 0.79(0.45,1.38)  | 0.4027  |                   |        | 0.86 (0.49, 1.53) | 0.6168  |                   |        | 1.27 (0.76, 2.12) | 0.3541  |                   |        |
| Hematuria          |                  |         |                   |        |                   |         |                   |        |                   |         |                   |        |
| No                 | Reference        |         | Reference         |        | Reference         |         |                   |        | Reference         |         | Reference         |        |
| Yes                | 0.46(0.28,0.74)  | 0.0015  | 0.48 (0.26, 0.86) | 0.0136 | 0.46 (0.28, 0.76) | 0.0026  |                   |        | 0.67 (0.42, 1.07) | 0.0950  | 0.65 (0.40, 1.07) | 0.0922 |
| Surgery margin     |                  |         |                   |        |                   |         |                   |        |                   |         |                   |        |
| Negative           | Reference        |         | Reference         |        | Reference         |         |                   |        | Reference         |         | Reference         |        |
| Positive           | 2.84(1.40,5.73)  | 0.0037  | 2.30 (0.99, 5.31) | 0.0515 | 3.18 (1.57, 6.47) | 0.0014  | 1.99 (0.91, 4.34) | 0.0837 | 2.22 (1.11, 4.44) | 0.0237  | 2.16 (0.99, 4.70) | 0.0535 |
| Bladder irrigation |                  |         |                   |        |                   |         |                   |        |                   |         |                   |        |
| No                 | Reference        |         |                   |        | Reference         |         |                   |        | Reference         |         |                   |        |
| Unilateral         | 1.51(0.54,4.25)  | 0.4365  |                   |        | 1.63 (0.57, 4.65) | 0.3606  |                   |        | 1.44 (0.47, 4.42) | 0.5221  |                   |        |
| Bilateral          | 0.55(0.24,1.25)  | 0.1534  |                   |        | 0.46 (0.19, 1.14) | 0.0925  |                   |        | 0.71 (0.32, 1.55) | 0.3851  |                   |        |
| Tumor architecture |                  |         |                   |        |                   |         |                   |        |                   |         |                   |        |
| Sessile            | Reference        |         | Reference         |        | Reference         |         |                   |        | Reference         |         | Reference         |        |
| Papillary          | 0.19(0.09,0.42)  | <0.0001 | 0.24 (0.08, 0.75) | 0.0137 | 0.18 (0.08, 0.42) | <0.0001 | 0.43 (0.17, 1.10) | 0.0787 | 0.54 (0.33, 0.89) | 0.0155  | 0.91 (0.47, 1.75) | 0.7735 |
| BCM                |                  |         |                   |        |                   |         |                   |        |                   |         |                   |        |
| No                 | Reference        |         |                   |        | Reference         |         |                   |        | Reference         |         |                   |        |
| Yes                | 0.70(0.28, 1.73) | 0.4380  |                   |        | 0.80 (0.32, 1.99) | 0.6274  |                   |        | 1.21 (0.60, 2.41) | 0.5946  |                   |        |
| Co-bladder cancer  |                  |         |                   |        |                   |         |                   |        |                   |         |                   |        |
| No                 | Reference        |         |                   |        | Reference         |         |                   |        | Reference         |         | Reference         |        |
| Yes                | 0.58(0.35, 0.95) | 0.0288  | 0.58 (0.33, 1.03) | 0.0641 | 0.69 (0.41, 1.15) | 0.1550  |                   |        | 0.36 (0.23, 0.57) | <0.0001 | 0.41 (0.25, 0.67) | 0.0004 |
| SIS(0 vs. 1)       |                  |         |                   |        |                   |         |                   |        |                   |         |                   |        |
| Low                | Reference        |         | Reference         |        | Reference         |         |                   |        | Reference         |         | Reference         |        |
| High               | 1.60(1.00,2.54)  | 0.0481  | 1.45 (0.84, 2.49) | 0.1827 | 1.60 (0.98, 2.60) | 0.0595  | 1.55 (0.90, 2.67) | 0.1122 | 1.55 (1.02, 2.37) | 0.0422  | 1.27 (0.79, 2.04) | 0.3318 |

<sup>a</sup>**Abbreviations:** UTUC = upper tract urothelial carcinoma, HR = hazard ratio, CI = confidence interval, SIS = systemic inflammation score, LNM = lymph node metastasis, LVI = lymphovascular invasion, BCM = bladder cuff management.
